# Supplementary material
Source: publisher figshare collection journal article supplement (https://acs.figshare.com/ndownloader/files/4073023)
Supplement: Supplementary file 1 [file 4073023]

## Supporting Information

# Copolythiophene-derived Colorimetric and Fluorometric Sensor for Lysophosphatidic Acid Based on the Multipoint Interactions

Minhuan Lan,<sup>§†</sup> Weimin Liu,<sup>\*†</sup> Ying Wang,<sup>†</sup> Jiechao Ge,<sup>†</sup> Jiasheng Wu,<sup>†</sup> Hongyan Zhang,<sup>†</sup> Jianhong Chen,<sup>§†</sup> Wenjun Zhang,<sup>‡</sup> and Pengfei Wang<sup>\*†</sup>

<sup>†</sup>Key Laboratory of Photochemical Conversion and Optoelectronic Materials,  
Technical Institute of Physics and Chemistry, Chinese Academy of Sciences, Beijing,  
100190, People's Republic of China

<sup>‡</sup>Center of Super-Diamond and Advanced Films (COSDAF) and Department of  
Physics and Materials Science, City University of Hong Kong, Hong Kong SAR (P.R.  
China)

<sup>§</sup>Graduate School of the Chinese Academy of Sciences, Beijing, 100049, China

<sup>\*</sup>Corresponding author. Tel: +86-10-82543435, Fax: +86-10-82543435, Email:  
wangpf@mail.ipc.ac.cn (Pengfei Wang) or wmliu@mail.ipc.ac.cn (Weimin Liu)

### Contents

1. Figure S1-S9. The <sup>1</sup>H NMR spectra, <sup>13</sup>C NMR spectra and MS spectra of compounds.
2. Figure S10. The <sup>1</sup>H NMR spectra of CPT9 in the presence of LPA.

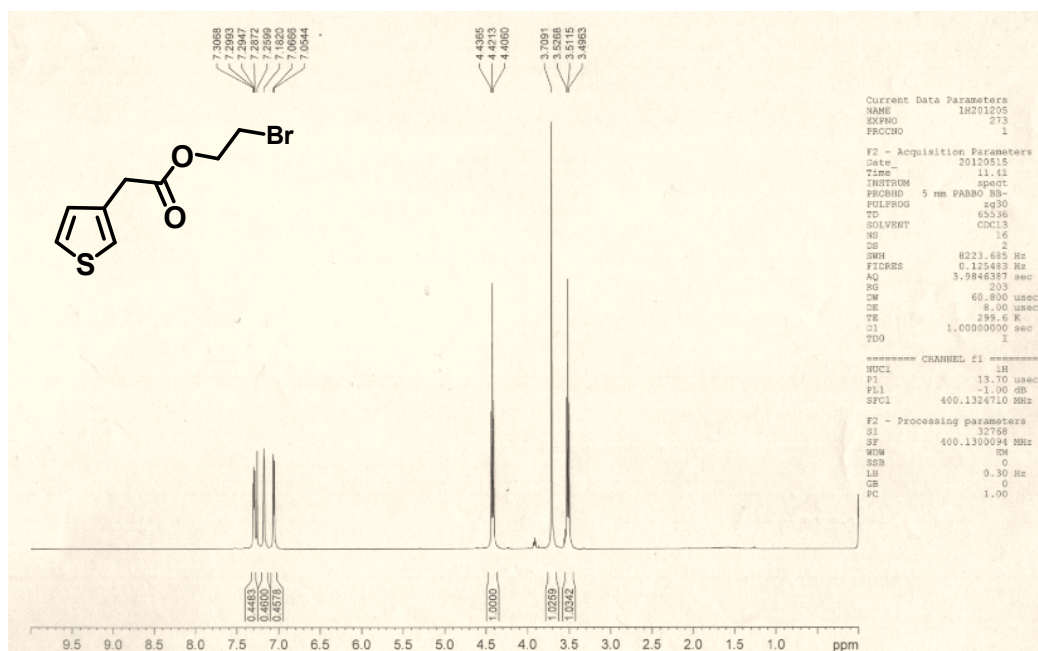

Figure S1. <sup>1</sup>H NMR (400 MHz) spectrum of compound **3** in CDCl<sub>3</sub>.

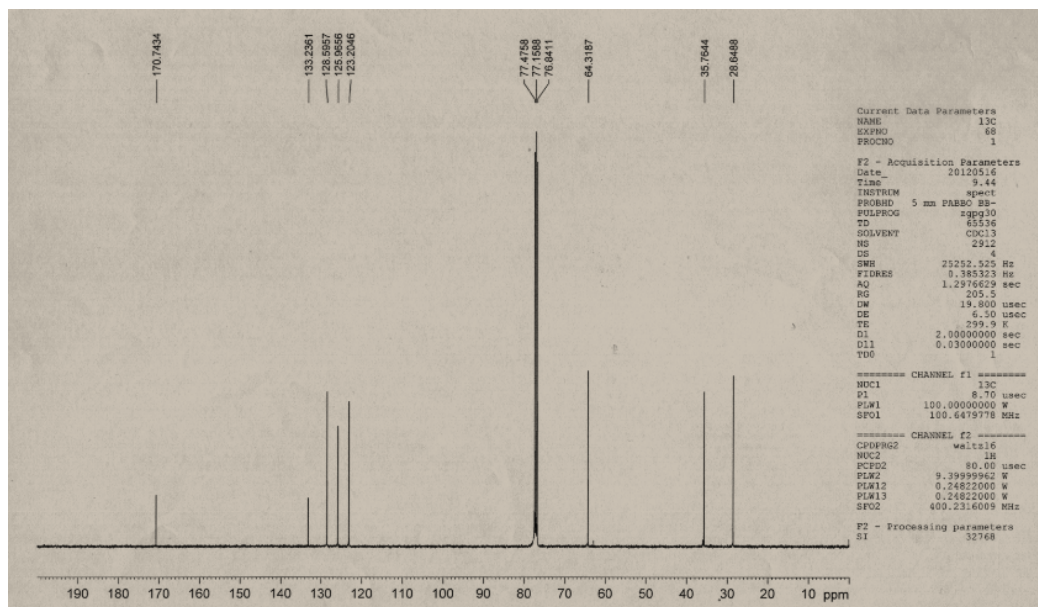

Figure S2. <sup>13</sup>C NMR (100 MHz) spectrum of compound **3** in CDCl<sub>3</sub>.

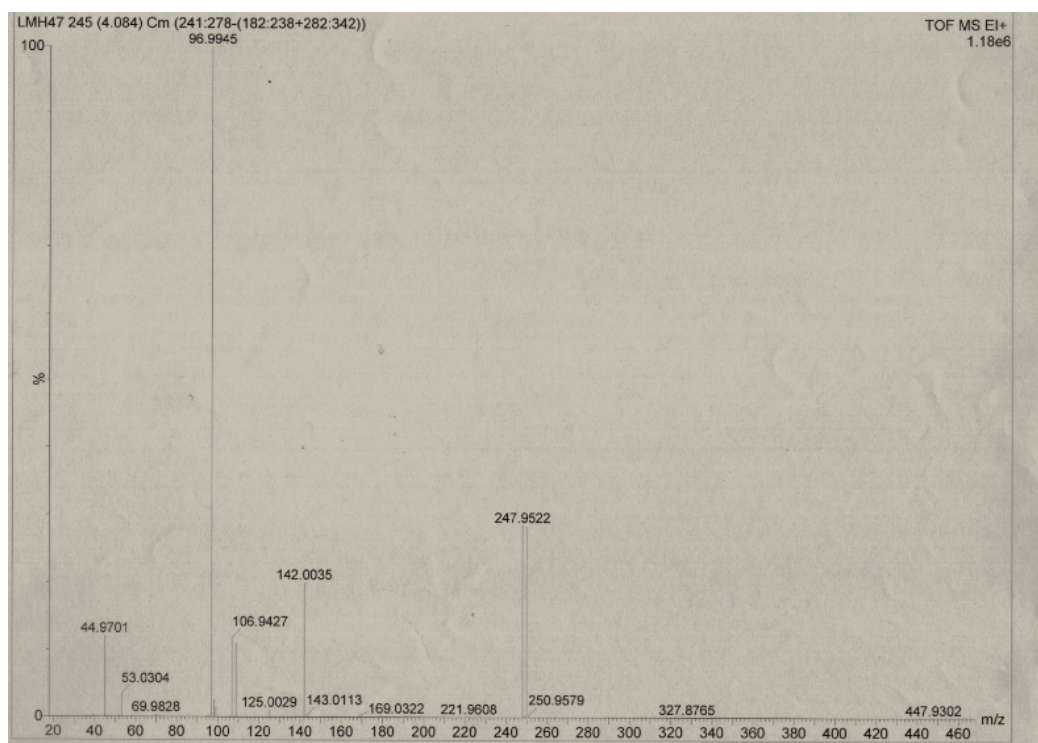

Figure S3. EI-MS spectrum of compound **3**.

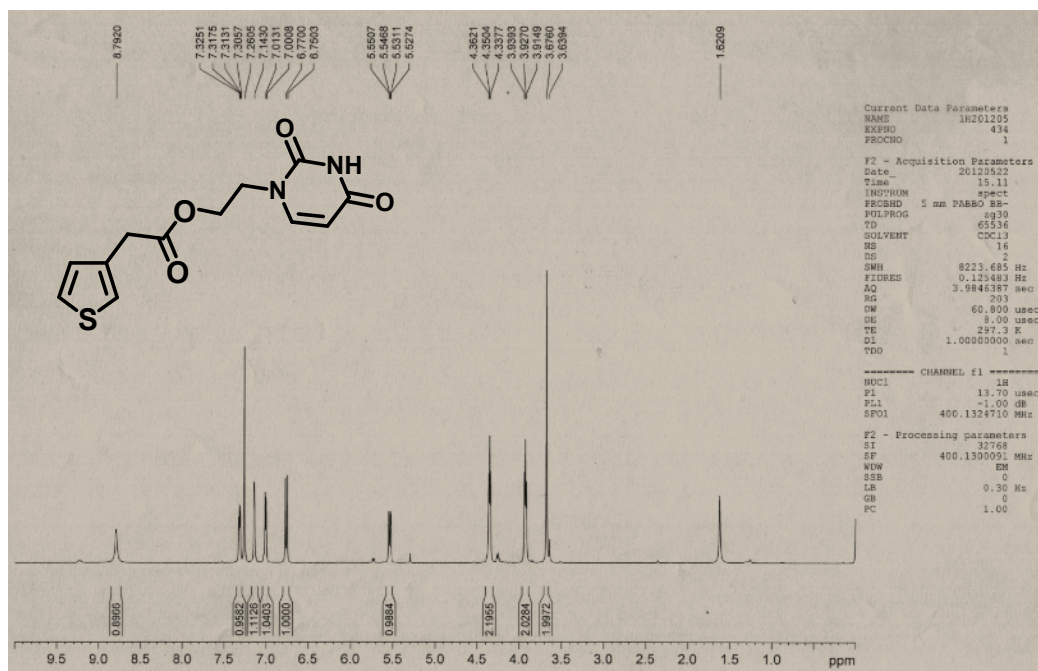

Figure S4.  $^1\text{H}$  NMR (400 MHz) spectrum of compound **4** in  $\text{CDCl}_3$ .



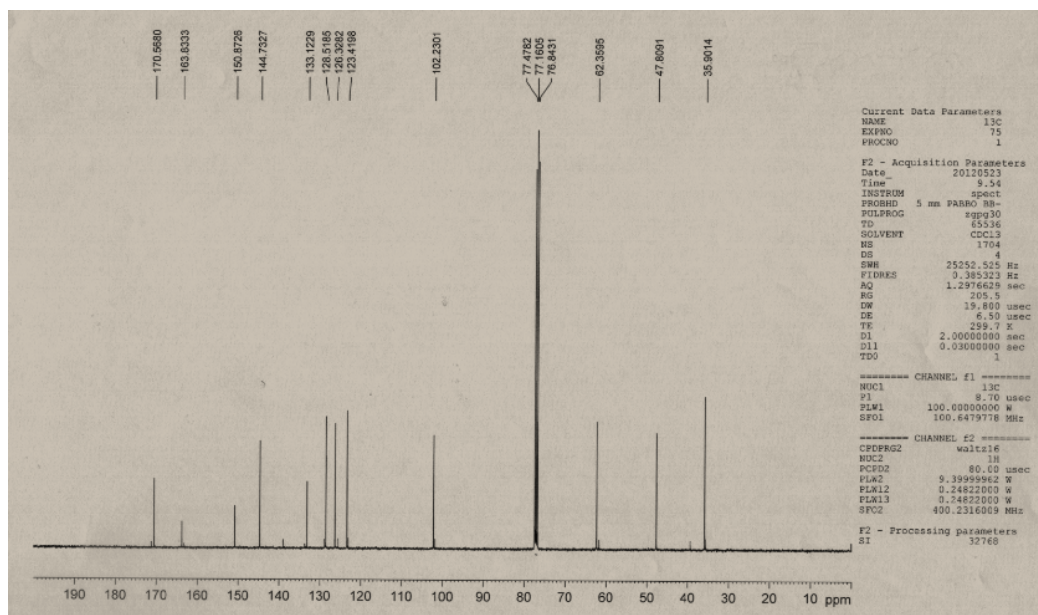

Figure S5.  $^{13}\text{C}$  NMR (100 MHz) spectrum of compound **4** in  $\text{CDCl}_3$ .

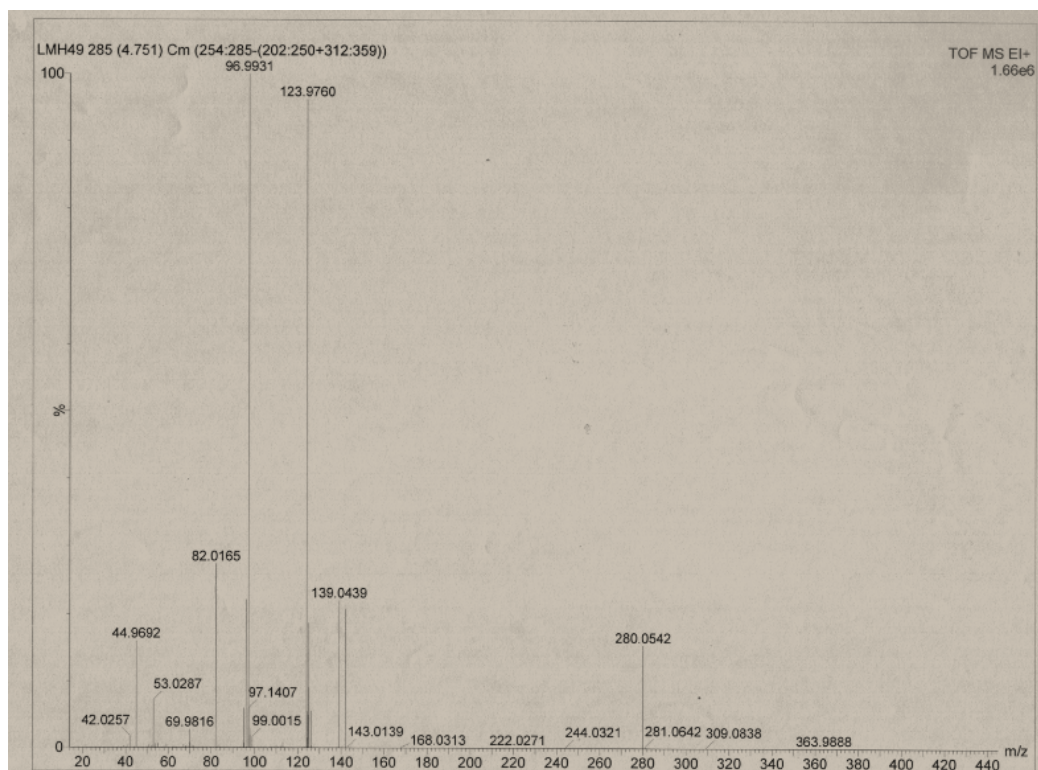

Figure S6. EI-MS spectrum of compound **4**.

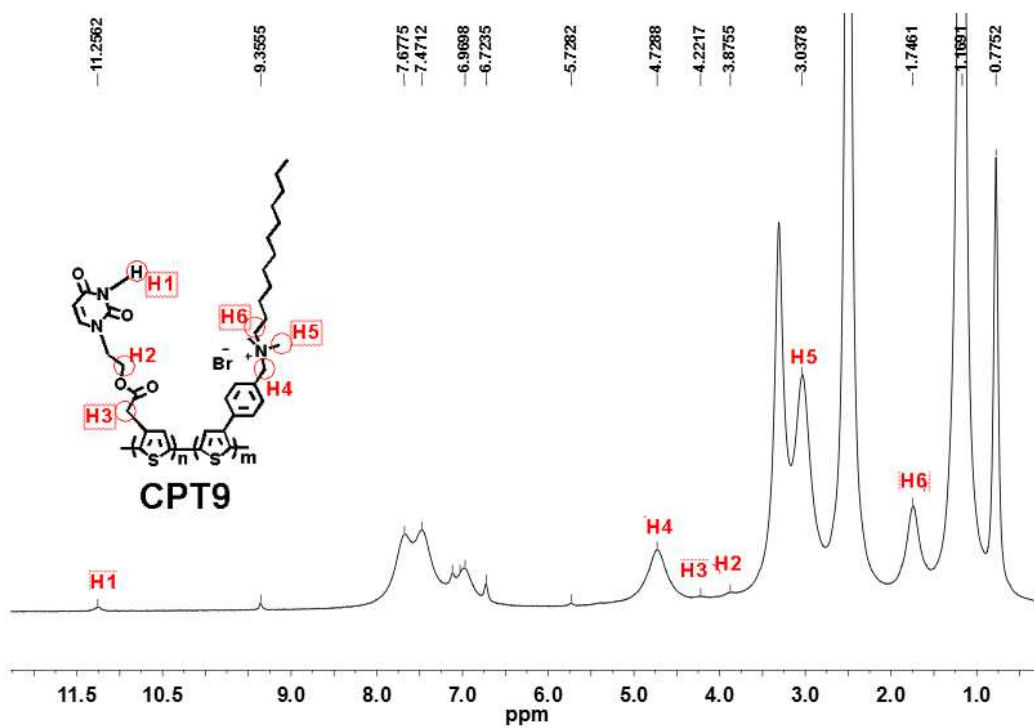

Figure S7.  $^1\text{H}$  NMR (400 MHz) spectrum of compound **CPT9** in DMSO.

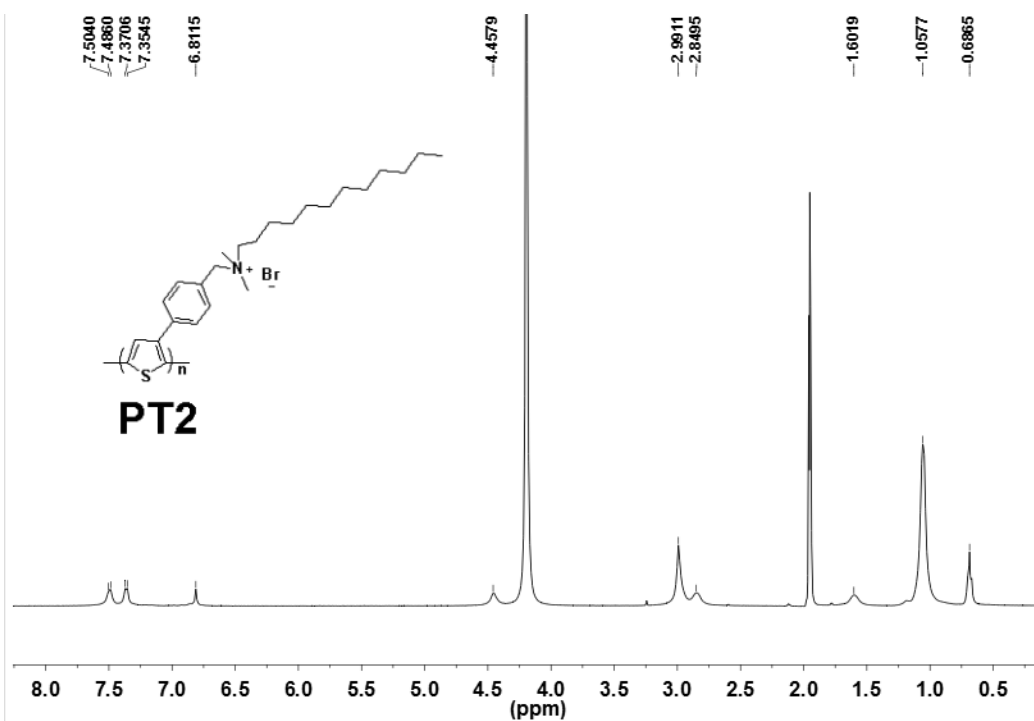

Figure S8.  $^1\text{H}$  NMR (400 MHz) spectrum of compound **PT2** in  $\text{CH}_3\text{CN}-\text{D}_2\text{O}$  ( $v/v=1/1$ ).

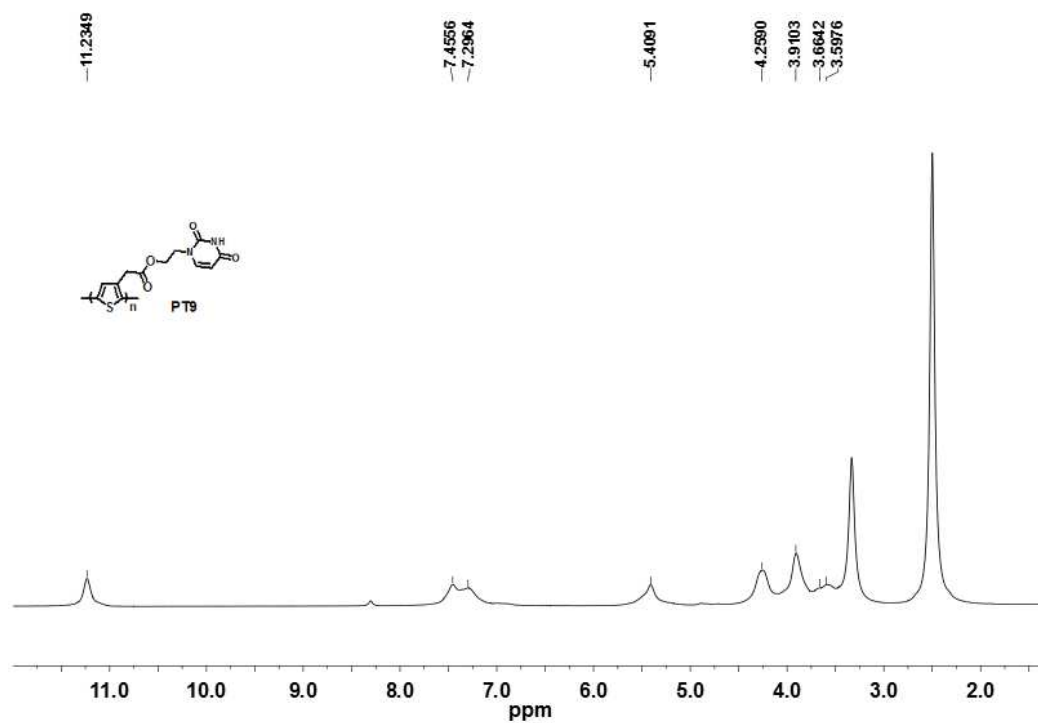

Figure S9. <sup>1</sup>H NMR (400 MHz) spectrum of compound **PT9** in DMSO.

### 3. <sup>1</sup>H NMR titrations of CPT9 with LPA.

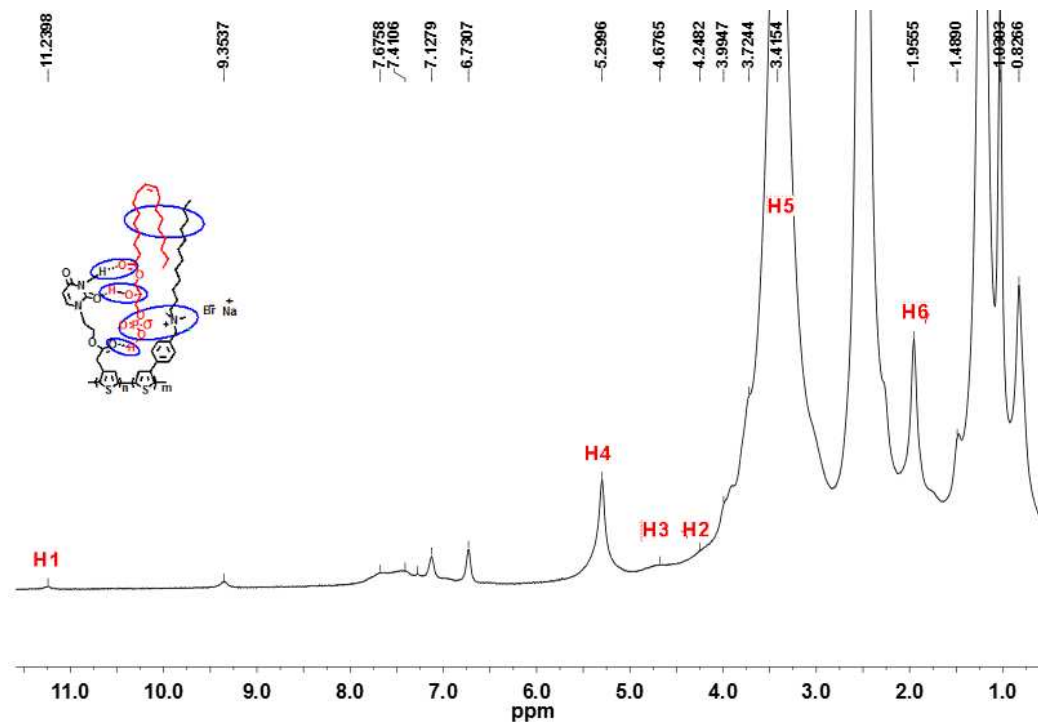

Figure S10. <sup>1</sup>H NMR (400 MHz) spectrum of compound **CPT9** in the presence of LPA in DMSO.
